# Supplementary material for: Genes uniquely expressed in human growth plate chondrocytes uncover a distinct regulatory network
Source: PubMed Central journal article supplement (PMC5738906; doi:10.1186/s12864-017-4378-y), 2017-12-20
Supplement: 12864_2017_4378_MOESM2_ESM.pdf [file 12864_2017_4378_MOESM2_ESM.pdf]

Figure S1

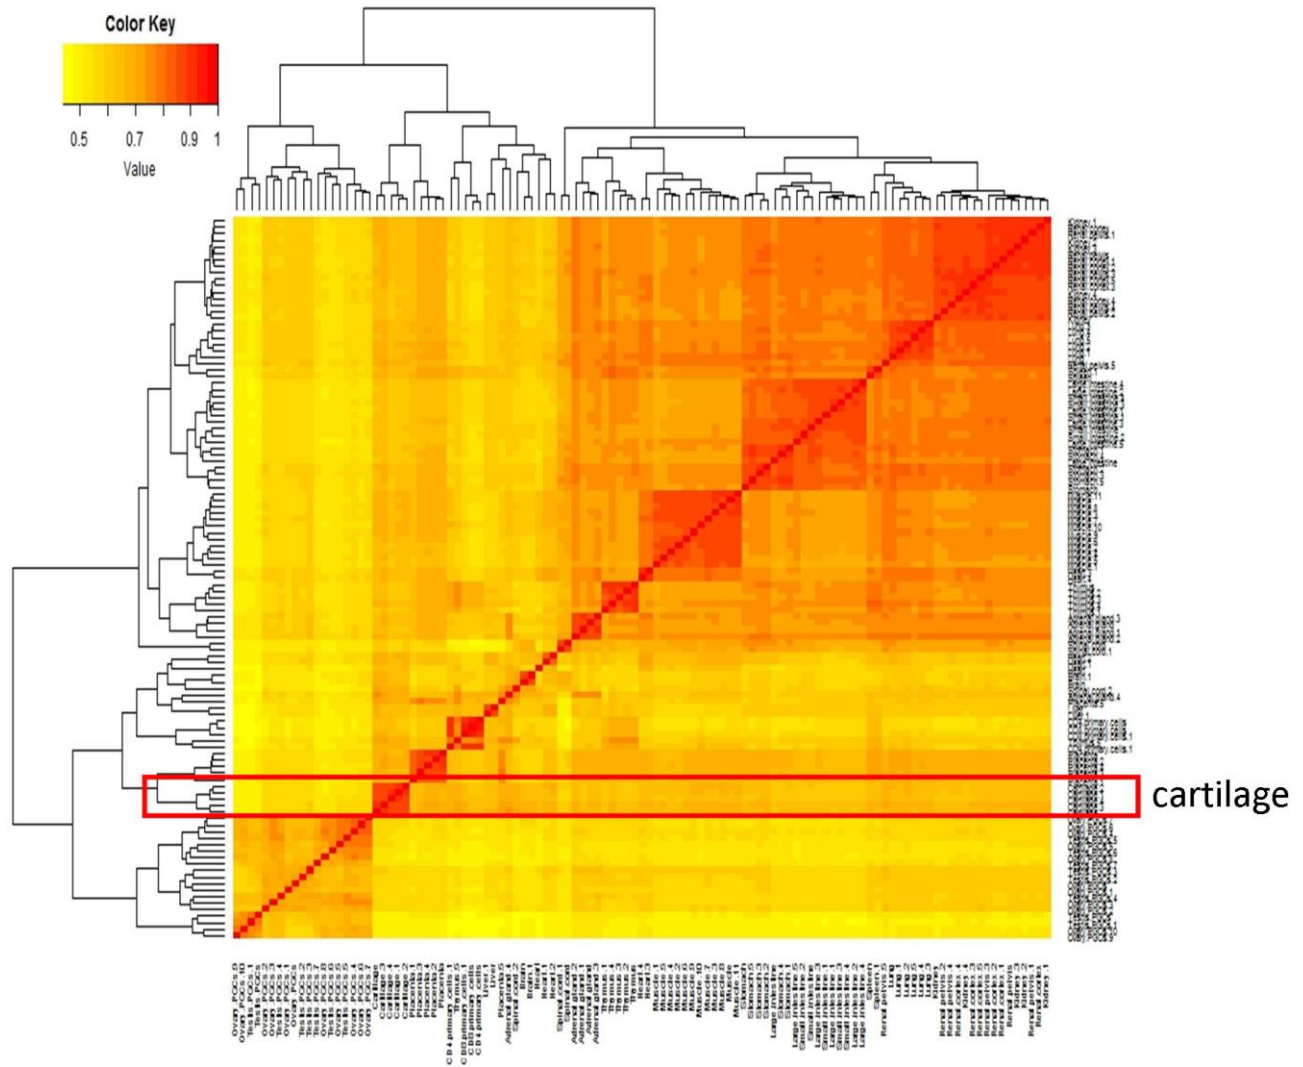

**Figure S1.** Dendrogram and heatmap of the Pearson's correlation coefficient for human tissue gene expression ( $\text{Log}_2\text{FPKM}$ ). Only genes with  $\text{FPKM} > 1$  in at least one sample were used for analysis. The cartilage samples are highlighted with a red frame.

Figure S2

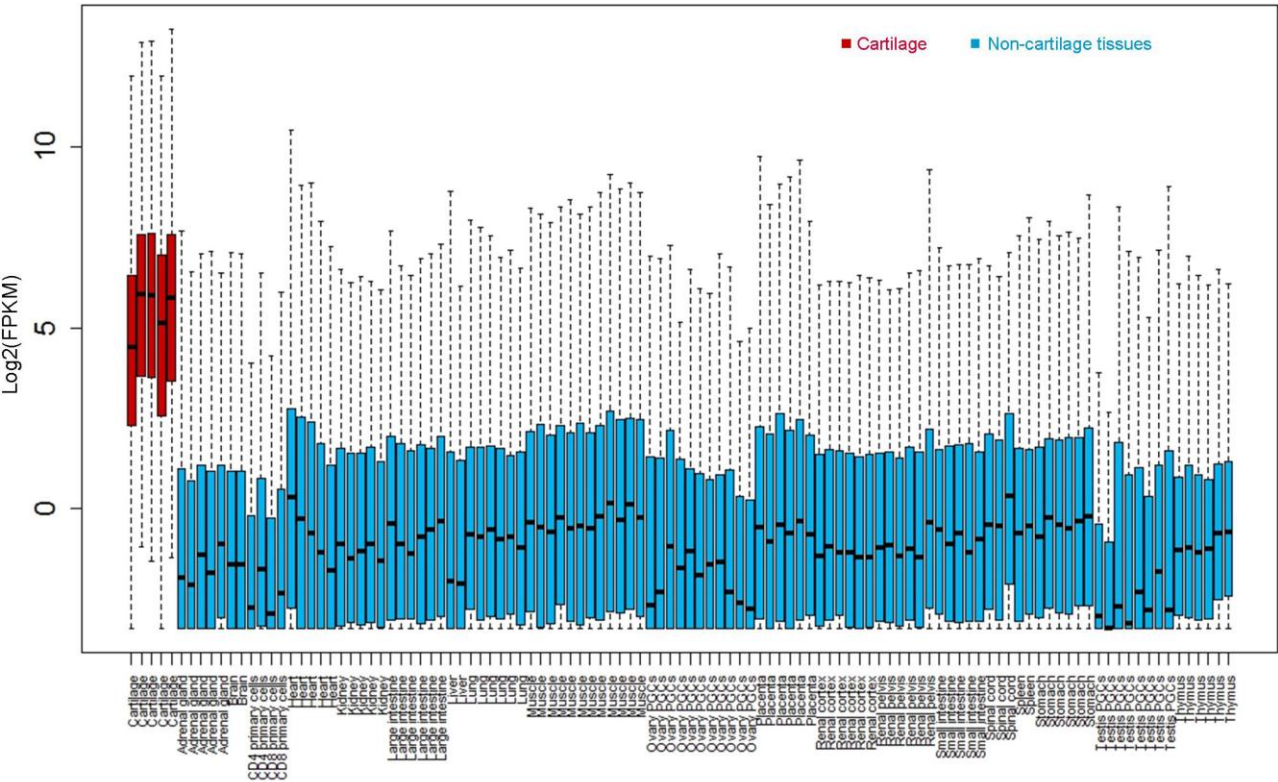

**Figure S2.** Box plots showing cartilage-selective gene expression in cartilage (red) and non-cartilage (blue) tissues. The thick horizontal line in each box represents the median gene expression value.



Figure S4

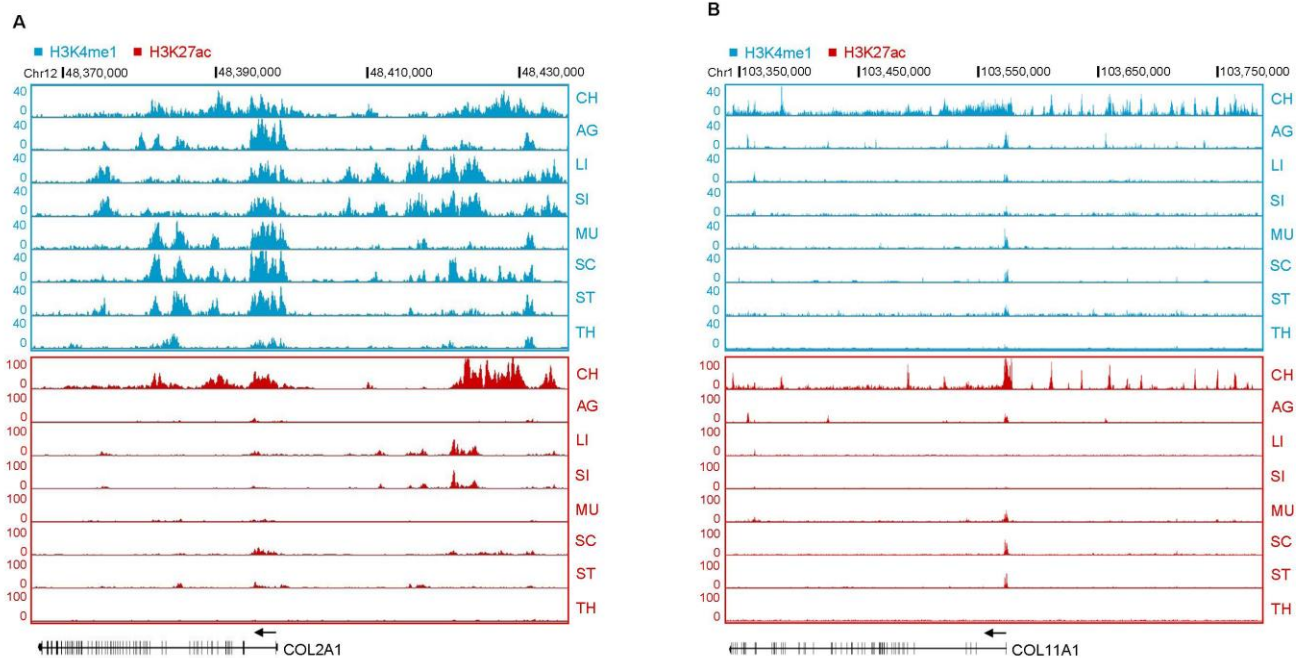

**Figure S4.** Genome browser views of H3K4me1 and H3K27ac peaks along **a** *COL2A1* and **b** *COL11A1* loci. Chromosome coordinates are shown as black bars on top. Black arrows indicate the direction of transcription on a diagram of each gene below. CH, chondrocytes. AG, adrenal gland. LI, large intestine. SI, small intestine. MU, muscle. SC, spinal cord. ST, stomach. TH, thymus.

**Figure S5**

**A**

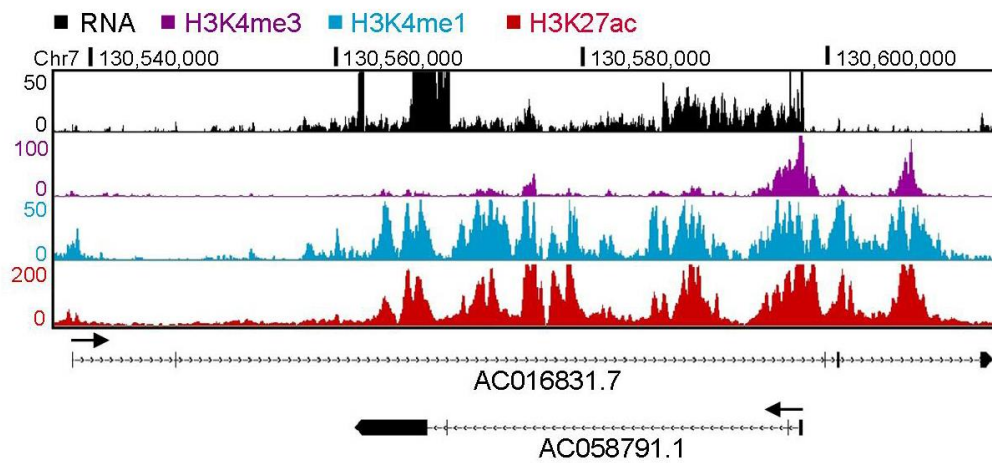

**B**

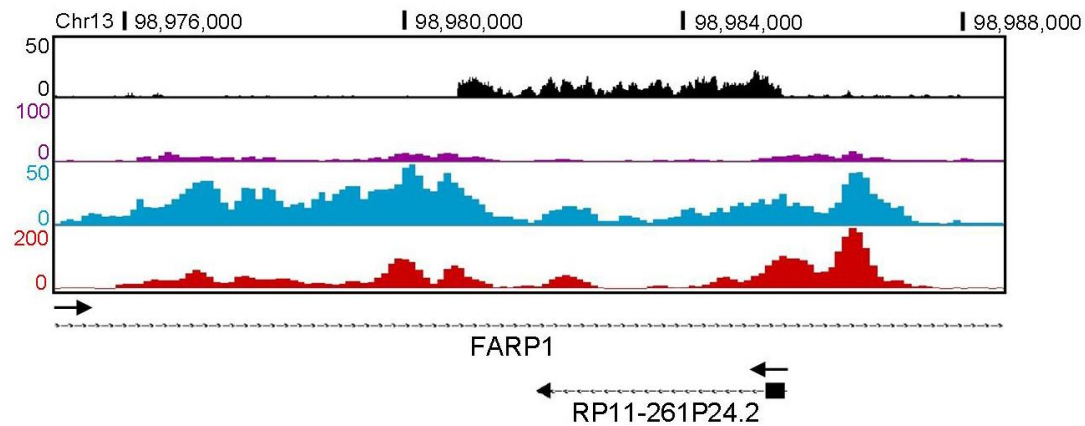

**Figure S5.** Genome browser views of H3K4me1, H3K4me3, H3K27ac peaks and RNA expression track along lncRNA loci (A) *AC058791.1* and (B) *RP11-261P24.2* in human chondrocytes.

Figure S6

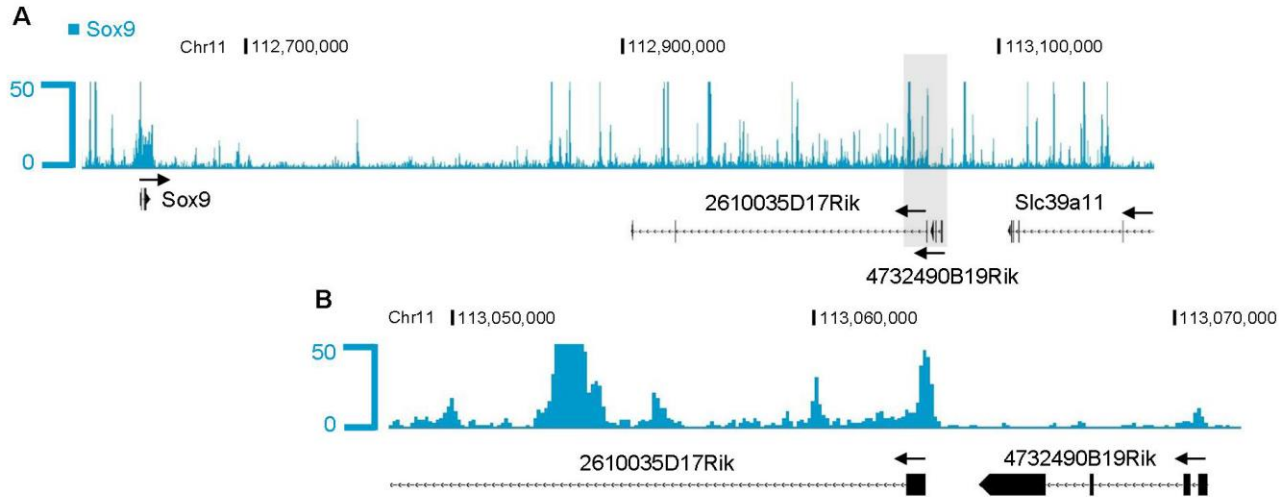

**Figure S6.** Sox9 binds to the lncRNA *2610035D17Rik* promoter and gene body in mouse rib chondrocytes. **a** Genome browser view of Sox9 binding along *Sox9* and *2610035D17Rik* loci on chromosome 11. **b** Shaded region in **a** was enlarged for a close view of Sox9 binding at the *2610035D17Rik* promoter and first intron.
